# Supplementary material for: Targeted Demethylation of the TGFβ1 mRNA Promotes Myoblast Proliferation via Activating the SMAD2 Signaling Pathway
Source: MDPI journal article supplement (doi:10.3390/cells12071005), 2023-03-24
Supplement: s1 [file s1]

## Supplementary information

# Targeted Demethylation of the TGF $\beta$ 1 mRNA Promotes Myoblast Proliferation via Activating the SMAD2 Signaling Pathway

Kaiping Deng<sup>1,2</sup>, Zhipeng Liu<sup>1,2</sup>, Xiaodan Li<sup>1,2</sup>, Zhen zhang<sup>1,2</sup>, Yixuan Fan<sup>1,2</sup>, Qunhao Huang<sup>3</sup>, Yanli Zhang<sup>1,2</sup>, Feng Wang<sup>1,2,\*</sup>

1 Institute of Sheep and Goat Science, Nanjing Agricultural University, Nanjing 210095, China

2 Institute of Haimen Goat Industry, Nanjing Agricultural University, Nanjing 210095, China

3 Animal Husbandry and Veterinary Station of Haimen District, Nantong 226100, China

\* Correspondence: caeet@njau.edu.cn; Tel.: +86 02584395381

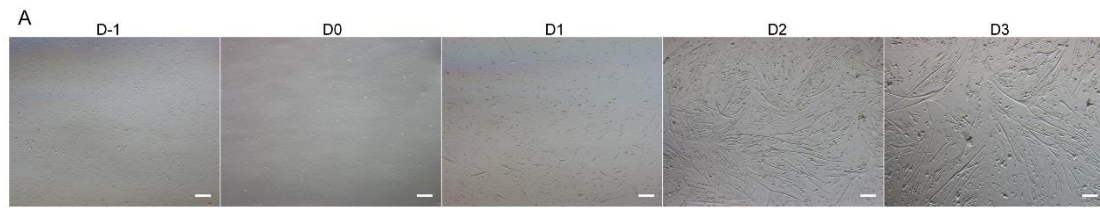

**Supplementary Figure S1.** Phase contrast microscopy images of GPMs at days -1 (D-1), 0 (confluence [D0]), 1 (D1), 2 (D2), and 3 (D3) of differentiation. Scale bars, 100  $\mu$ m.

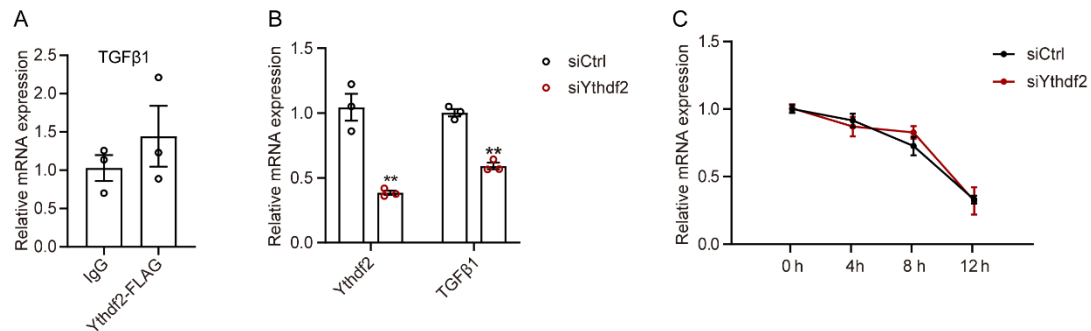

**Supplementary Figure S2.** Ythdf2 was not involved in m<sup>6</sup>A regulated TGF $\beta$ 1 expression: (A) Ythdf2 RIP-qPCR analysis of TGF $\beta$ 1 mRNA level in GPMs transfected with YTHDF2-FLAG vector; (B) GPMs were treated with Ythdf2 siRNA (siYthdf2), and the mRNA expression of Ythdf2 and TGF $\beta$ 1 were measured at 36 h; (C) After transfection with siCtrl or siYthdf2 for 36 h, cells were treated with actinomycin D for the indicated times, and the relative expression level of TGF $\beta$ 1 was checked by qRT-PCR.

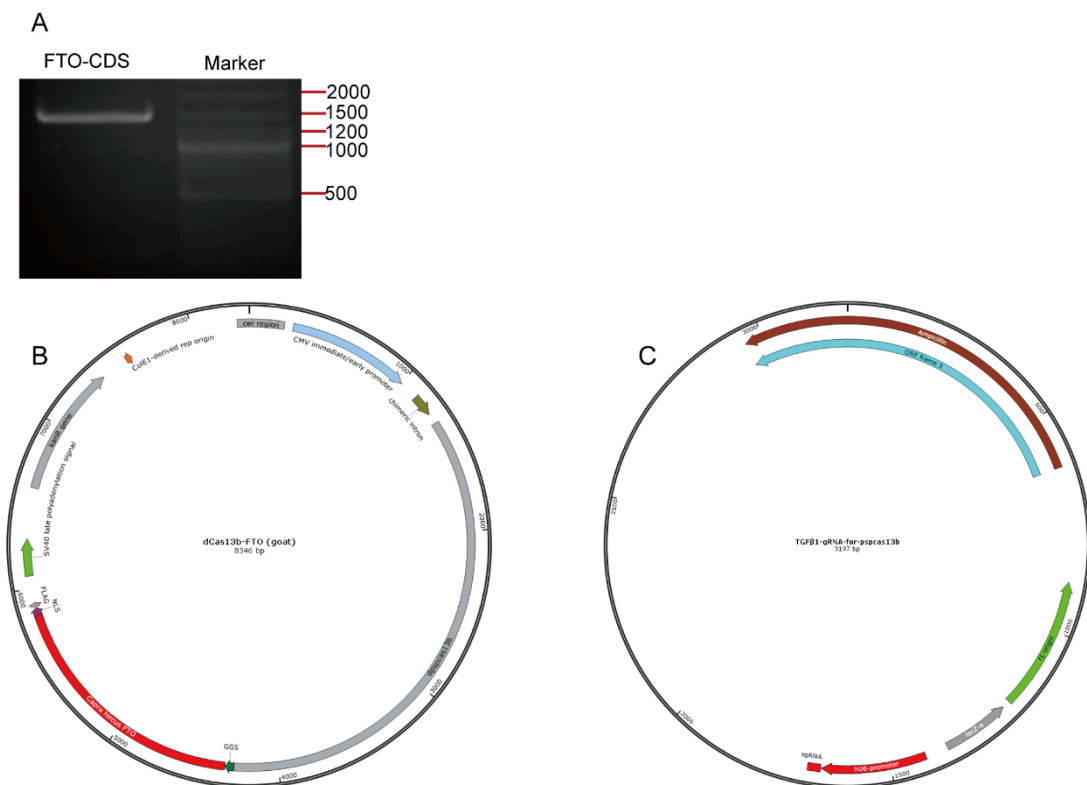

**Supplementary Figure S3** the supplement to Figure 6: (A) The represented FTO amplification product using skeletal muscle cDNA of goat; The plasmid profiles of reconstructed CRIPSR/dCas13b-FTO plasmid (B) and plasmids containing gRNA targeted TGFβ1 (C).

**Supplementary Table S2. Details for siRNA sequence.**

| Target | Sense (5' to 3')      | Anti-sense (5' to 3') |
|--------|-----------------------|-----------------------|
| Ctrl   | UUCUCCGAACGUGUCACGUTT | ACGUGACACGUUCGGAGAATT |
| TGFβ1  | GUGGAGCUGUACCAGAAAUTT | AUUUCUGGUACAGCUCCACTT |
| FTO    | ACAAGCAUGGCUGUUUAUUTT | AAUAAACAGCCAUGCUUGUGC |
| Mettl3 | GGAGAUAGAGAGCCUUCUUTT | AAGAAGGCUCUCUAUCUCCTT |

**Supplementary Table S3 Details of primer sequences used for quantitative real-time PCR**

| Items    | Primer sequence (5'-3')     | Fragment size (bp) |
|----------|-----------------------------|--------------------|
| TGFβ1    | F: CTCCGTCTGCCTCCTCCTGTC    | 147                |
|          | R: TAGGGTCCAAGGTGCTCAGTCAAG |                    |
| Ythdf2   | F: CAGGCATCAGTAGGGCAACA     | 228                |
|          | R: GGACCGCAACTTCTCCAAGA     |                    |
| SMAD2    | F: TGGACCACCGCTTTTGGTAA     | 272                |
|          | R: CCATCTAGAGACCTTGGTATGGT  |                    |
| SMAD3    | F: GCCCACAGGTTCTCAAGGAA     | 285                |
|          | R: TTCAACATCGGGCTGTGAGT     |                    |
| FTO      | F: AACGAGAGCGCGAAGCTAAG     | 274                |
|          | R: CCGATGAGGATGCGAGAGAC     |                    |
| Mettl3   | F: GGTCTGGCCTCTTCCACATC     | 229                |
|          | R: CTTGAACCTGAGCCCGACCT     |                    |
|          | R: GAAAGTCGTTGTGGGCGGTT     |                    |
| MyHC     | F: CTGTCCAAGTTCCGCAAGGT     | 182                |
|          | R: GAGCTTCGTTGCACCCTCAA     |                    |
|          | R: TTCATGGTGGCTGCATCAGT     |                    |
| 18S rRNA | F: GTGATGGGGATCGGGGATTG     | 116                |

|                 |                          |     |
|-----------------|--------------------------|-----|
|                 | R: GTAGCGACGGGCGGTGTGTA  |     |
| GAPDH           | R: CCGTTCGACAGATAGCCGTAA | 296 |
|                 | F: AGGATCTCGCTCCTGGAAGAT |     |
| qPCR-<br>SELECT | R: ATGCAGCGACTCAGCCTCTG  |     |
|                 | F: TAGCCAGTACCGTAGTGCGTG |     |

**Supplementary Table S4. Primers used for SELECT qPCR in the present study**

| SELECT     | UP (5' to 3')                                | DOWN (5' to 3')                                            |
|------------|----------------------------------------------|------------------------------------------------------------|
| TGFβ1-A358 | tagccagtaccgtagtgctgtgctgtctggggtcc<br>tcaag | <b>5phos</b> /cctgcctcgcgaggcaacgccagaggctgagt<br>cgctgcat |

**Supplementary Table S5. Details of antibodies**

| Antibodies                                            | Cat No.    | Source      | Dilution of WB |
|-------------------------------------------------------|------------|-------------|----------------|
| MyHC                                                  | Ab11083    | Abcam       | 1:3000         |
| TGFβ1                                                 | Ab215715   | Abcam       | 1:1000         |
| PCNA                                                  | ab18197    | Abcam       | 1:1000         |
| BAX                                                   | 50599-2-Ig | Proteintech | 1:5000         |
| BCL2                                                  | 12789-1-AP | Proteintech | 1:1000         |
| FTO                                                   | bs-7056R   | Bioss       | 1:1000         |
| METTL3                                                | 15073-1-AP | Proteintech | 1:1000         |
| Smad2                                                 | AF6497     | Affinity    | 1:1000         |
| Phospho-Smad2 (Ser467)                                | AF3449     | Affinity    | 1:1000         |
| FLAG                                                  | T0003      | Affinity    | 1:5000         |
| TUBA                                                  | 11224-1-AP | Proteintech | 1:5000         |
| GADPH                                                 | 60004-1-IG | Proteintech | 1:8000         |
| Goat anti-Rabbit IgG (H+L)<br>Secondary Antibody, HRP | 31460      | Invitrogen  | 1:10000        |
| HRP-conjugated Affinipure Goat<br>Anti-Mouse IgG(H+L) | SA00001-1  | Proteintech | 1:8000         |
