# Supplementary figures and images for: Targeted Demethylation of the TGFβ1 mRNA Promotes Myoblast Proliferation via Activating the SMAD2 Signaling Pathway
Source: MDPI journal article supplement (doi:10.3390/cells12071005), 2023-03-24

Fig. 1E

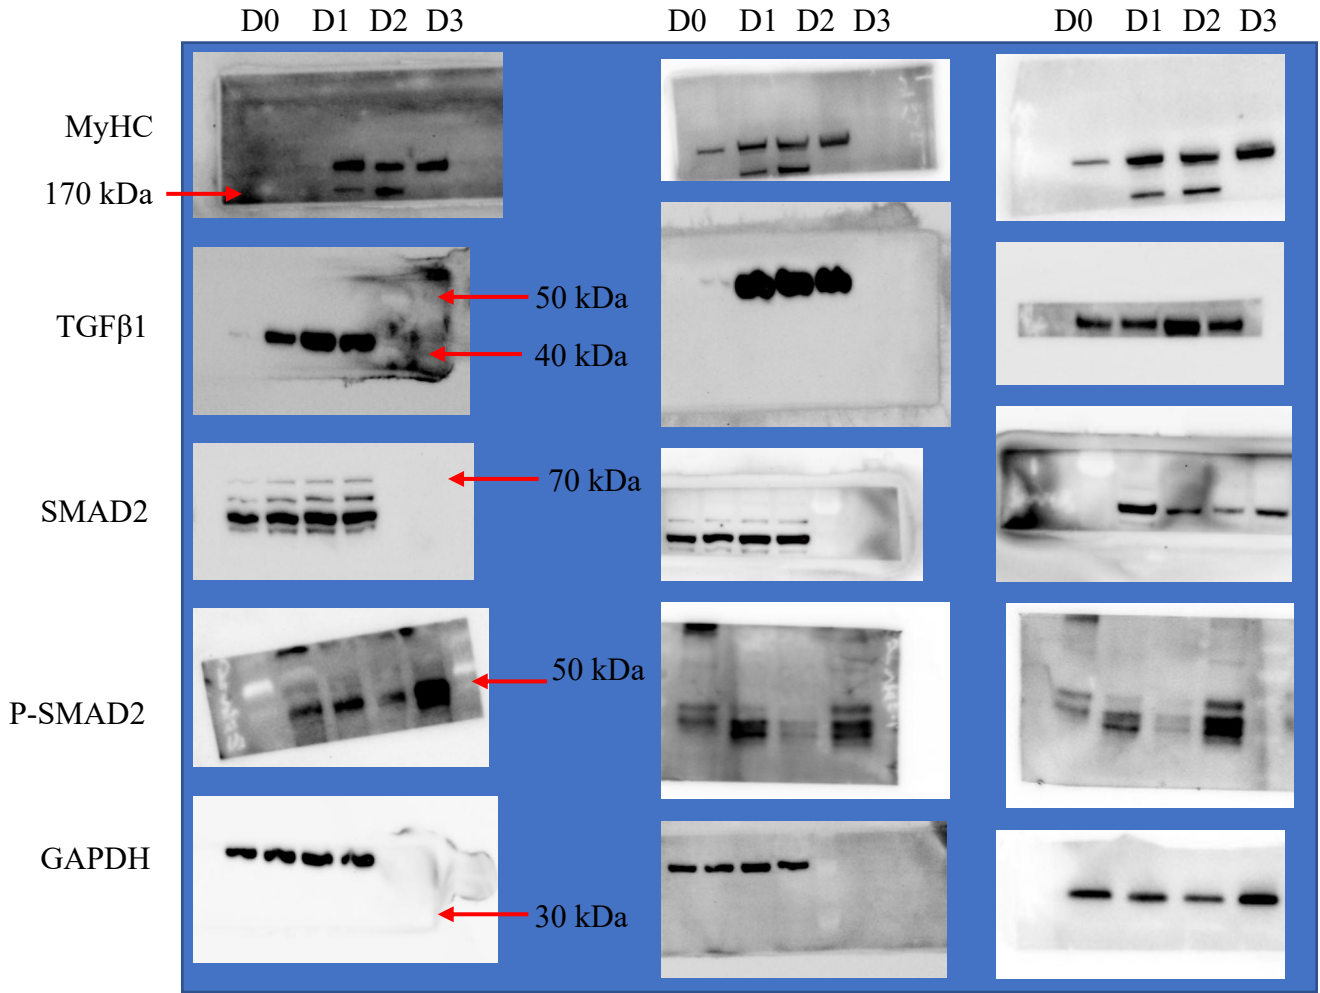

Fig. 2E

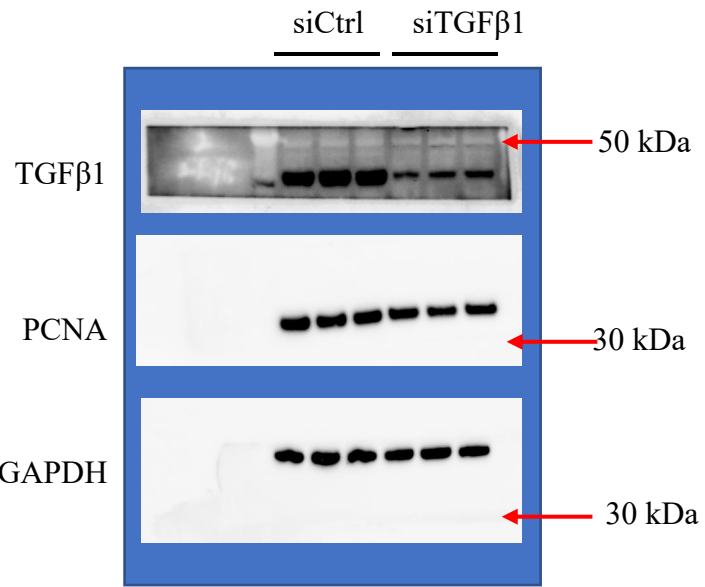

Fig. 2J

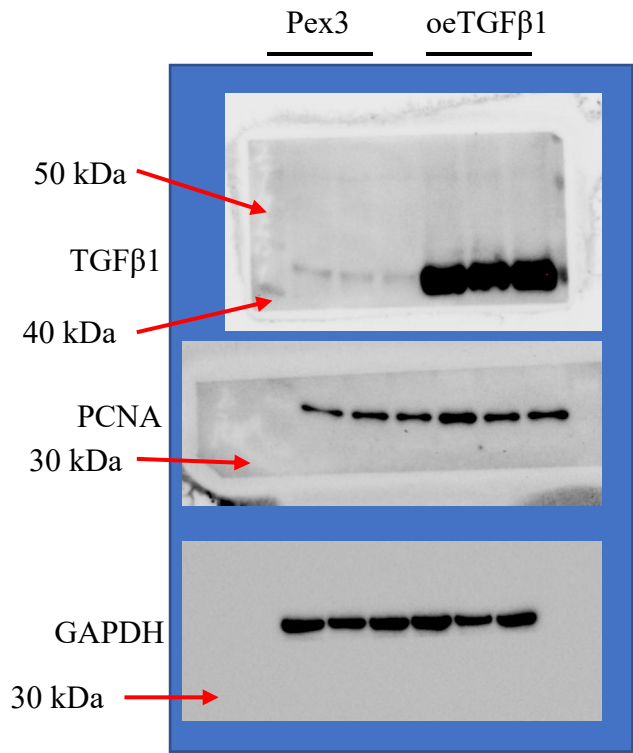

Fig. 3B

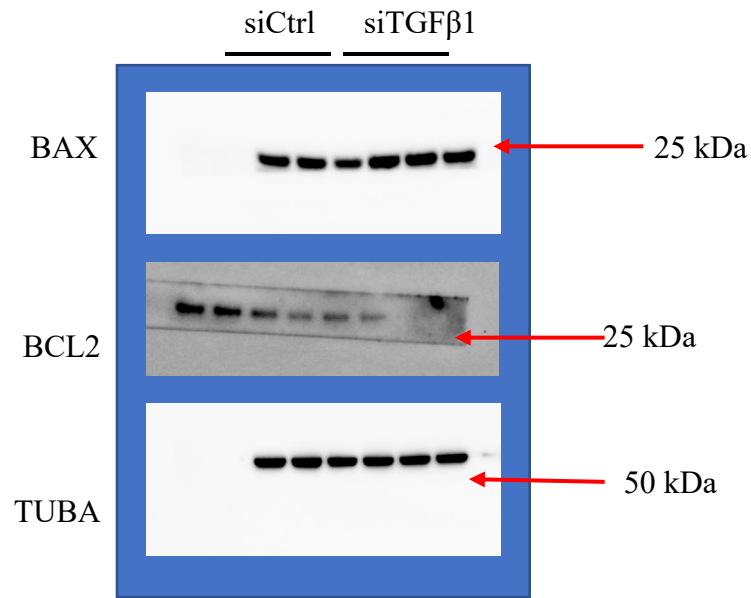

Fig. 4C

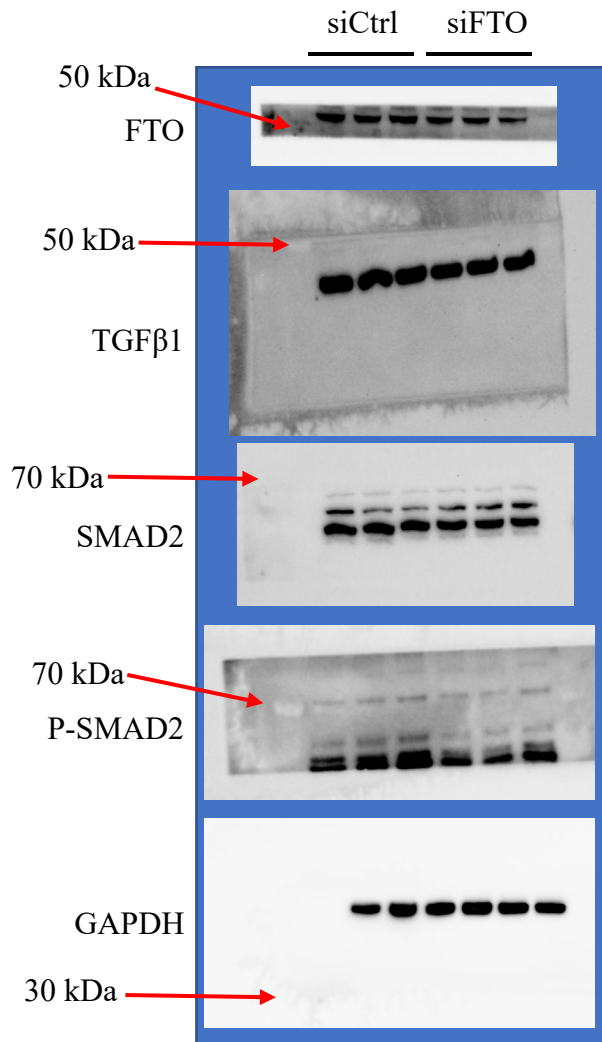

Fig. 4E

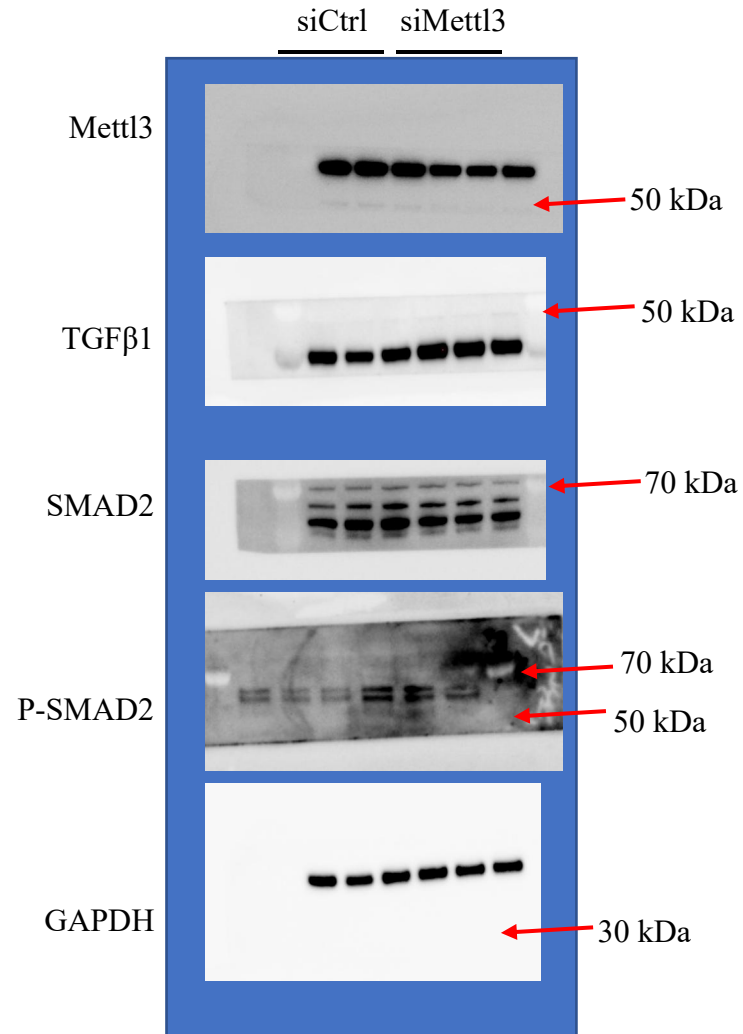

Fig 6H

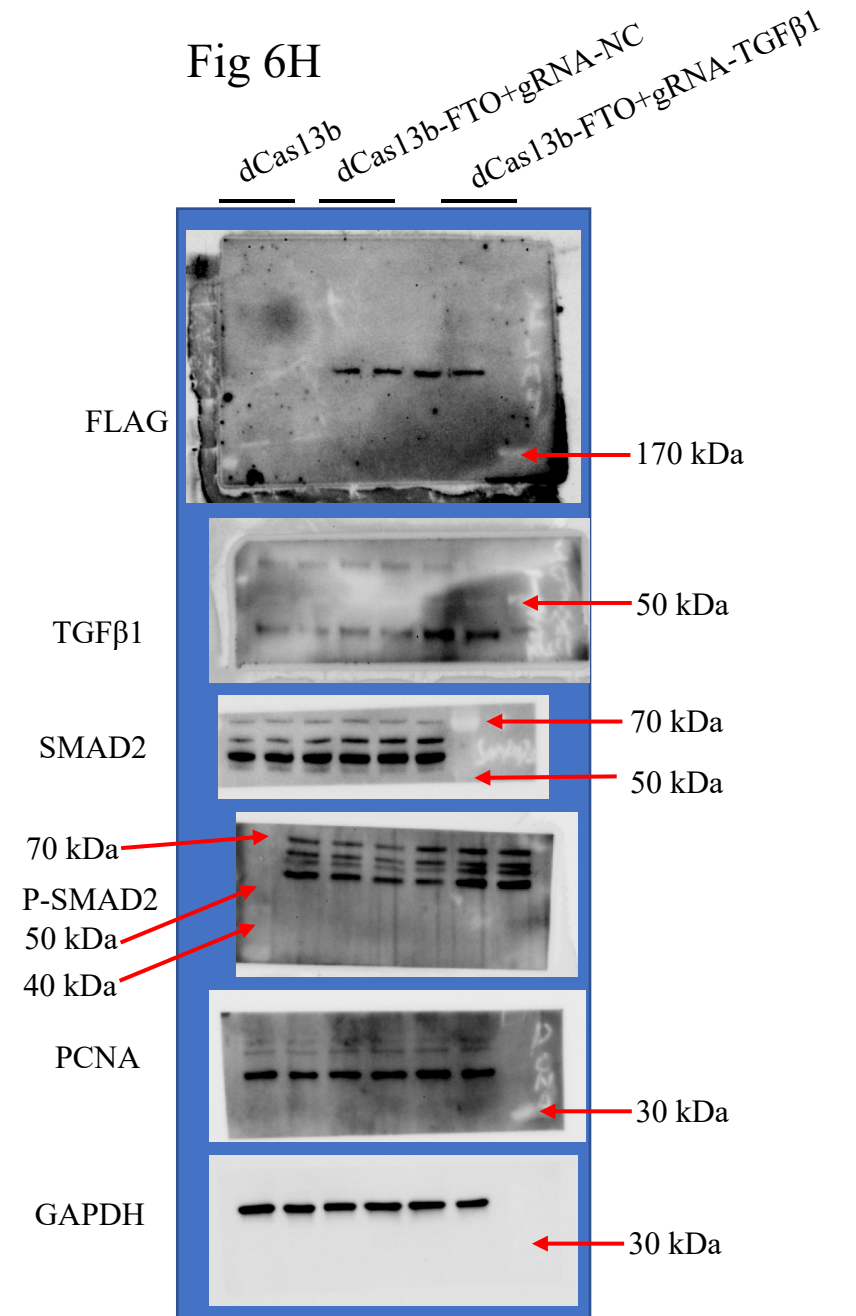

Supplement: s1 [file s1]
